# Supplementary material for: Assessing Matrix Solid-Phase Dispersion Extraction Strategies for Determining Bisphenols and Phthalates in Gilthead Sea Bream Samples
Source: MDPI journal article supplement (doi:10.3390/foods13030413), 2024-01-27
Supplement: s1 [file s1]

# Supporting information

*Article*

## **Assessing Matrix Solid-Phase Dispersion Extraction Strategies for Determining Bisphenols and Phthalates in Gilthead Sea Bream Samples**

**Dulce L. Soliz †, Rosa Ma Garcinuno \*, Gema Paniagua González, Juan Carlos Bravo and Pilar Fernández Hernando**

Department of Analytical Science, Faculty of Science, National University of Distance Education, UNED, Las Rozas, 28232 Madrid, Spain; dsoliz@ccia.uned.es (D.L.S.); gpaniagua@ccia.uned.es (G.P.G.); juancarlos.bravo@ccia.uned.es (J.C.B.); pfhernando@ccia.uned.es (P.F.H.)

\* Correspondence: Correspondence: rmgarcinuno@ccia.uned.es

† Researcher in training at the International Doctoral School of UNED, in the Doctoral Program in Sciences.

## **Table of contents**

**Table S1 Target compounds, ions, cone voltage and retention time in ionized positive (ESI+) mode for HPLC–MS detection.**

**Table S2 Target compounds, ions, cone voltage and retention time in ionized negative (ESI–) mode for HPLC–MS detection.**

Table S1. Target compounds, ions, cone voltage and retention time in ionized positive (ESI+) mode for HPLC–MS detection.

| <b>Analytes</b> | <b>Ion SIM</b> | <b>Cone Voltage, eV</b> | <b>Retention time (t<sub>R</sub>), min</b> |
|-----------------|----------------|-------------------------|--------------------------------------------|
| DEP             | 149, 177       | 100                     | 10.489                                     |
| DBP             | 149, 205       | 100                     | 22.679                                     |
| DEHP            | 149, 167, 279  | 120                     | 34.976                                     |

Table S2. Target compounds, ions, cone voltage and retention time in ionized negative (ESI–) mode for HPLC–MS detection.

| <b>Analytes</b> | <b>Ion SIM</b>      | <b>Cone Voltage, eV</b> | <b>Retention time (t<sub>R</sub>), min</b> |
|-----------------|---------------------|-------------------------|--------------------------------------------|
| BPS             | 92, 108, 156, 249   | 120                     | 3.376                                      |
| BPF             | 98, 183, 199.1, 200 | 120                     | 4.563                                      |
| BPA             | 119, 213, 228       | 120                     | 6.244                                      |
